# Supplementary material
Source: publisher figshare collection journal article supplement (https://acs.figshare.com/ndownloader/files/4551019)
Supplement: Supplementary file 1 [file 4551019]

## Supplementary materials

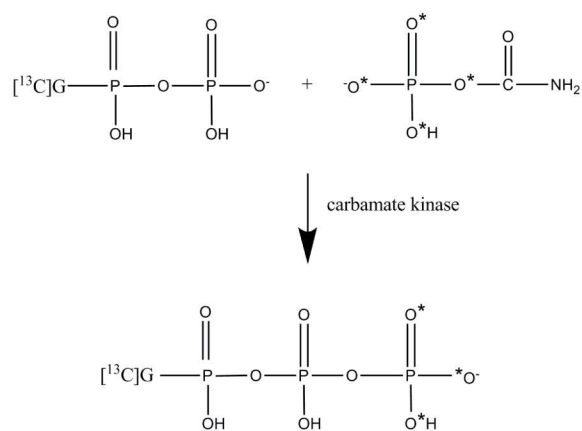

Scheme 1. Synthesis of  $[^{13}\text{C}, \gamma^{18}\text{O}_3]\text{GTP}$ . G stands for guanosine. O\* indicates  $^{18}\text{O}$  labeling.

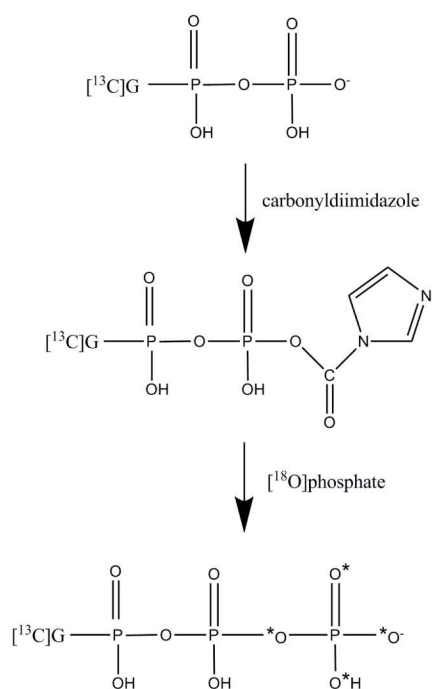

Scheme 2. Synthesis of  $[^{13}\text{C}, \gamma^{18}\text{O}_4]\text{GTP}$ . G stands for guanosine. O\* indicates  $^{18}\text{O}$  labeling.

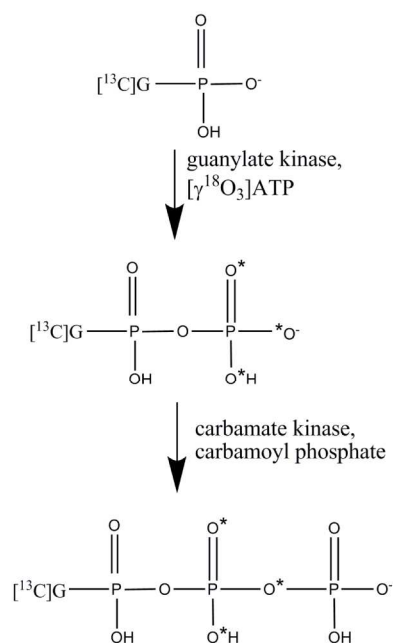

Scheme 3. Synthesis of  $[^{13}\text{C}, \beta^{18}\text{O}_3]\text{GTP}$ . G stands for guanosine. O\* indicates  $^{18}\text{O}$  labeling.

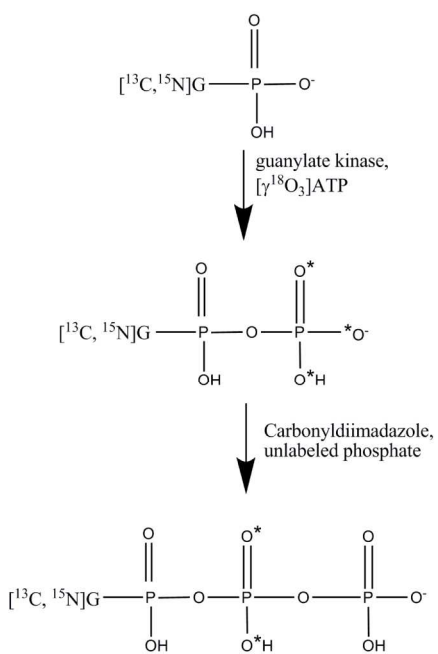

Scheme 4. Synthesis of  $[^{13}\text{C}, ^{15}\text{N}, \beta^{18}\text{O}_2]\text{GTP}$ . G stands for guanosine. O\* indicates  $^{18}\text{O}$  labeling.

A. Synthesis of [ $^{13}\text{C}$ ,  $^{15}\text{N}$ ,  $\beta\text{S}$ ]GDP

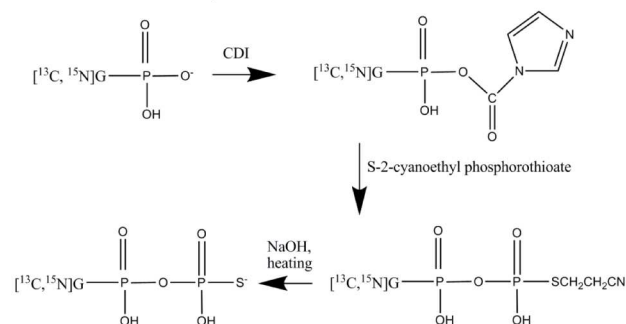

B. Synthesis of [ $^{13}\text{C}$ ,  $^{15}\text{N}$ , pro-R  $\beta^{18}\text{O}$ ]GTP

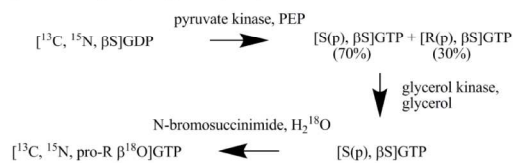

C. Synthesis of [ $^{13}\text{C}$ ,  $^{15}\text{N}$ , pro-S  $\beta^{18}\text{O}$ ]GTP

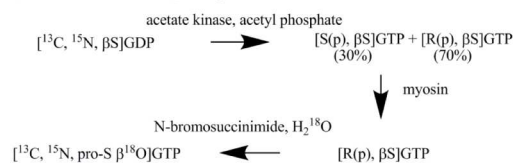

Scheme 5. Synthesis of [ $^{13}\text{C}$ ,  $^{15}\text{N}$ , pro-S,  $\beta^{18}\text{O}$ ]GTP and [ $^{13}\text{C}$ ,  $^{15}\text{N}$ , pro-R,  $\beta^{18}\text{O}$ ]GTP. G stands for guanosine. O\* indicates  $^{18}\text{O}$  labeling. CDI and PEP stand for carboxyldiimidazole and phosphoenolpyruvate.
